# Supplementary material for: Efficient ligand-free Hiyama cross-coupling reaction catalyzed by functionalized SBA-15-supported Pd nanoparticles
Source: Royal Society of Chemistry journal article supplement (doi:10.1039/c4gc00141a), 2014-01-01
Supplement: c4gc00141a1.pdf [file c4gc00141a1.pdf]

## SUPPORTING INFORMATION

# Efficient Ligand-Free Hiyama Cross-Coupling Reaction Catalyzed by Functionalized SBA-15-Supported Pd Nanoparticles

*Shao-Hsien Huang,<sup>1</sup> Chun-Hsia Liu<sup>1</sup> and Chia-Min Yang<sup>1,2\*</sup>*

1. Department of Chemistry, National Tsing Hua University, Hsinchu 30013, Taiwan

2. Frontier Research Center on Fundamental and Applied Sciences of Matters, National Tsing

Hua University, Hsinchu 30013, Taiwan

CORRESPONDING AUTHOR FOOTNOTE:

Professor Dr. Chia-Min Yang

e-mail: [cmyang@mx.nthu.edu.tw](mailto:cmyang@mx.nthu.edu.tw)

Tel: 886-3-5731282; Fax: 886-3-5165521

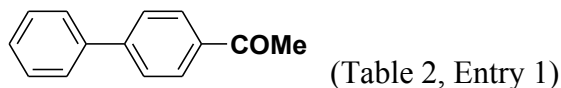

#### 4-Phenylacetophenone<sup>[1]</sup>

<sup>1</sup>H NMR (CDCl<sub>3</sub>, 300 MHz) δ 2.62 (s, 3H), 7.39 – 7.48 (m, 3H), 7.61 (d, *J* = 8.1 Hz, 2H), 7.68 (d, *J* = 8.1 Hz, 2H), 8.02 (d, *J* = 8.1 Hz, 2H).

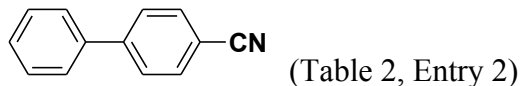

#### 4-Cyanobiphenyl<sup>[2]</sup>

<sup>1</sup>H NMR (CDCl<sub>3</sub>, 300 MHz) δ 7.39 – 7.50 (m, 3H), 7.56 – 7.59 (m, 2H), 7.64 – 7.72 (m, 4H). <sup>13</sup>C NMR (CDCl<sub>3</sub>, 75 MHz) δ 110.8, 118.9, 127.1, 127.6, 128.6, 129.0, 132.5, 139.0, 145.5.

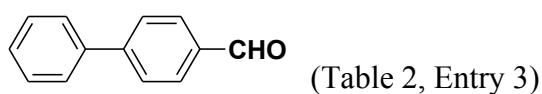

#### 4-Phenylbenzaldehyde<sup>[3]</sup>

<sup>1</sup>H NMR (CDCl<sub>3</sub>, 300 MHz) δ 7.37 – 7.50 (m, 3H), 7.61 – 7.64 (m, 2H), 7.94(d, *J* = 8.1 Hz, 2H), 7.94(d, *J* = 8.1 Hz, 2H), 10.0 (s, 1H).

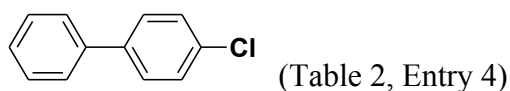

#### 4-Chlorobiphenyl<sup>[1]</sup>

<sup>1</sup>H NMR (CDCl<sub>3</sub>, 300 MHz) δ 7.38 – 7.51 (m, 5H), 7.54 – 7.61 (m, 4H). <sup>13</sup>C NMR (CDCl<sub>3</sub>, 75 MHz) δ 126.9, 127.5, 128.3, 128.4, 133.3, 139.6, 139.9.

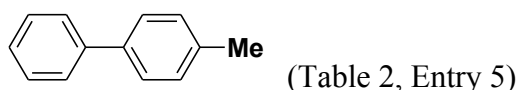

#### 4-Methylbiphenyl<sup>[2]</sup>

<sup>1</sup>H NMR (CDCl<sub>3</sub>, 300 MHz) δ 2.45 (s, 3H), 7.29 – 7.31 (m, 2H), 7.35 – 7.40 (m, 1H), 7.45 – 7.50 (m, 2H), 7.54 – 7.56 (m, 2H), 7.62 – 7.65 (m, 2H).

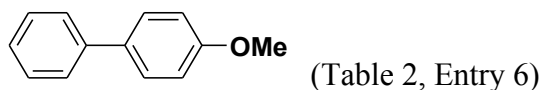

#### 4-Methoxybiphenyl<sup>[1]</sup>

<sup>1</sup>H NMR (CDCl<sub>3</sub>, 300 MHz) δ 3.87 (s, 3H), 7.02 (d, *J* = 8.7 Hz, 2H), 7.32 – 7.37 (m, 1H), 7.43 – 7.48 (m, 2H), 7.56 – 7.61 (m, 4H).

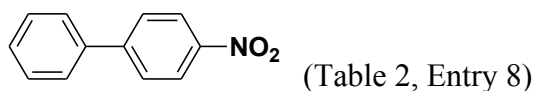

#### 4-Nitrobiphenyl<sup>[4]</sup>

<sup>1</sup>H NMR (CDCl<sub>3</sub>, 300 MHz) δ 7.43 – 7.52 (m, 3H), 7.61 (d, *J* = 8.1 Hz, 2H), 7.72 (d, *J* = 8.7 Hz, 2H), 8.28 (d, *J* = 8.7 Hz, 2H).

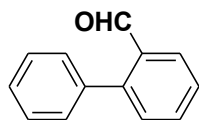

(Table 2, Entry 9)

### 2-Phenylbenzaldehyde <sup>[1]</sup>

<sup>1</sup>H NMR (CDCl<sub>3</sub>, 300 MHz)  $\delta$  7.35 – 7.45 (m, 2H), 7.45 – 7.66 (m, 6H), 8.01 (d,  $J$  = 7.5 Hz, 1H), 9.97 (s, 1H).

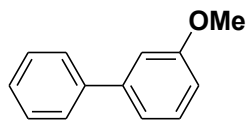

(Table 2, Entry 10)

### 3-Methoxybiphenyl <sup>[4]</sup>

<sup>1</sup>H NMR (CDCl<sub>3</sub>, 300 MHz)  $\delta$  3.82 (s, 3H), 6.87 (d,  $J$  = 8.1 Hz, 1H), 7.12 – 7.18 (m, 2H), 7.30 – 7.36 (m, 2H), 7.41 (t,  $J$  = 7.8 Hz, 2H), 7.57 (d,  $J$  = 7.5 Hz, 2H).

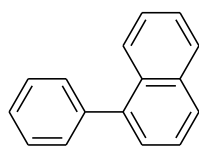

(Table 2, Entry 11)

### 1-Phenylnaphthalene <sup>[2]</sup>

<sup>1</sup>H NMR (CDCl<sub>3</sub>, 300 MHz)  $\delta$  7.49 – 7.63 (m, 9H), 7.92 – 8.03 (m, 3H). <sup>13</sup>C NMR (CDCl<sub>3</sub>, 75 MHz)  $\delta$  125.3, 125.7, 126.0, 126.9, 127.2, 127.6, 128.2, 130.0, 131.6, 133.7, 140.2, 140.7.

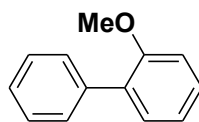

(Table 2, Entry 12)

### 2-Methoxybiphenyl <sup>[1]</sup>

<sup>1</sup>H NMR (CDCl<sub>3</sub>, 300 MHz)  $\delta$  3.81 (s, 3H), 6.98 – 7.04 (m, 2H), 7.31 – 7.35 (m, 3H), 7.40 – 7.44 (m, 2H), 7.53 – 7.55 (m, 2H).

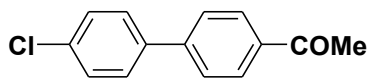

(Table 3, Entry 1)

### 4-Acetyl-4'-chlorobiphenyl <sup>[1]</sup>

<sup>1</sup>H NMR (CDCl<sub>3</sub>, 300 MHz)  $\delta$  2.60 (s, 3H), 7.39 (d,  $J$  = 8.4 Hz, 2H), 7.51 (d,  $J$  = 8.4 Hz, 2H), 7.60 (d,  $J$  = 8.1 Hz, 2H), 7.99 (d,  $J$  = 8.1 Hz, 2H).

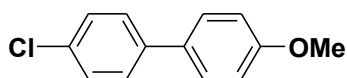

(Table 3, Entry 2)

### 4-Chloro-4'-methoxybiphenyl <sup>[2]</sup>

<sup>1</sup>H NMR (CDCl<sub>3</sub>, 300 MHz)  $\delta$  3.84 (s, 3H), 6.97 (d,  $J$  = 8.7 Hz, 2H), 7.37 (d,  $J$  = 8.7 Hz, 2H), 7.45 – 7.50 (m, 4H).

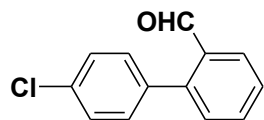

(Table 3, Entry 3)

**4'-Chlorobiphenyl-2-carboxaldehyde** <sup>[5]</sup>

<sup>1</sup>H NMR (CDCl<sub>3</sub>, 300 MHz)  $\delta$  7.26 – 7.30 (m, 2H), 7.36 – 7.42 (m, 3H), 7.47 (t,  $J$  = 7.5 Hz, 1H), 7.61 (dt,  $J$  = 7.5 Hz, 1.5 Hz, 1H), 7.99 (dd,  $J$  = 7.8 Hz, 1.5 Hz, 1H), 9.93 (s, 1H).

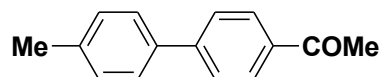

(Table 3, Entry 4)

**4-Acetyl-4'-methylbiphenyl** <sup>[1]</sup>

<sup>1</sup>H NMR (CDCl<sub>3</sub>, 300 MHz)  $\delta$  2.40 (s, 3H), 2.61 (s, 3H), 7.26 (d,  $J$  = 8.1 Hz, 2H), 7.52 (d,  $J$  = 8.1 Hz, 2H), 7.65 (d,  $J$  = 8.4 Hz, 2H), 8.00 (d,  $J$  = 8.4 Hz, 2H).

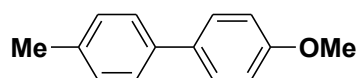

(Table 3, Entry 5)

**4'-Methoxy-4-methylbiphenyl** <sup>[1]</sup>

<sup>1</sup>H NMR (CDCl<sub>3</sub>, 300 MHz)  $\delta$  2.43 (s, 3H), 3.87 (s, 3H), 7.01 (d,  $J$  = 8.7 Hz, 2H), 7.27 (d,  $J$  = 8.1 Hz, 2H), 7.50 (d,  $J$  = 8.1 Hz, 2H), 7.56 (d,  $J$  = 8.4 Hz, 2H).

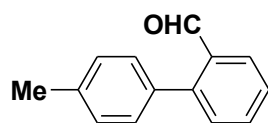

(Table 3, Entry 6)

**4'-Methylbiphenyl-2-carboxaldehyde** <sup>[6]</sup>

<sup>1</sup>H NMR (CDCl<sub>3</sub>, 300 MHz)  $\delta$  2.42 (s, 3H), 7.24 – 7.26 (m, 4H), 7.41 – 7.48 (m, 2H), 7.58 – 7.64 (m, 1H), 8.00 (d,  $J$  = 7.8 Hz, 1H), 9.98 (s, 1H).

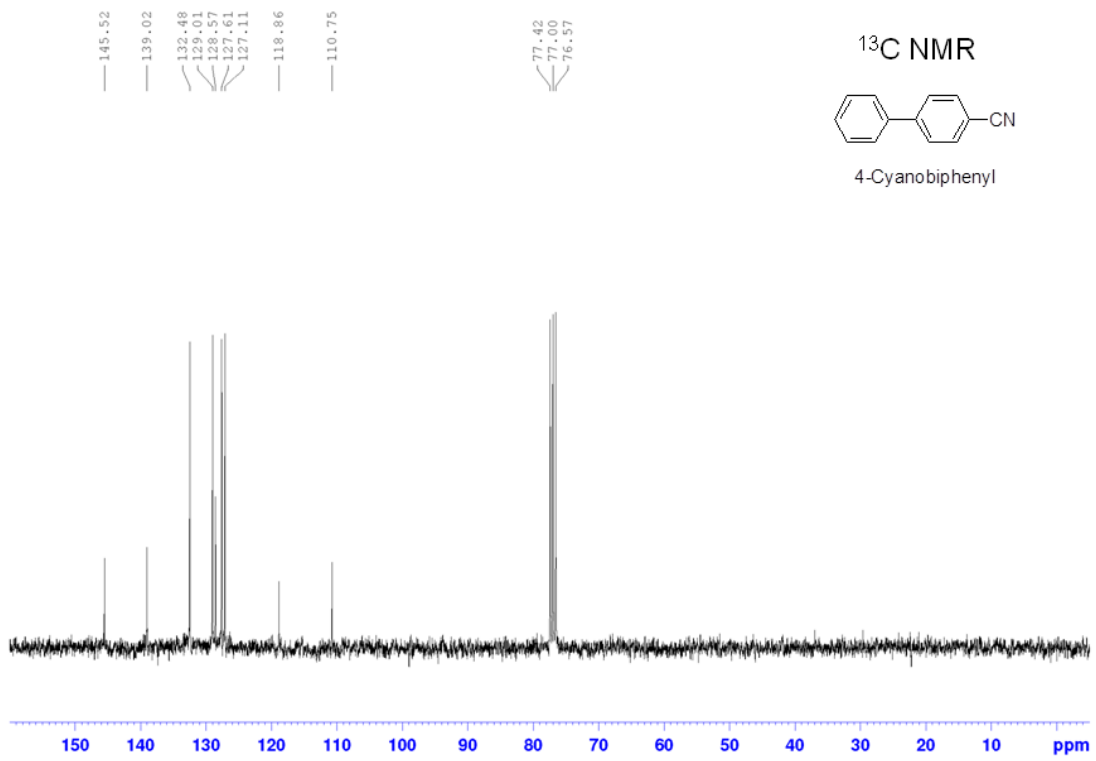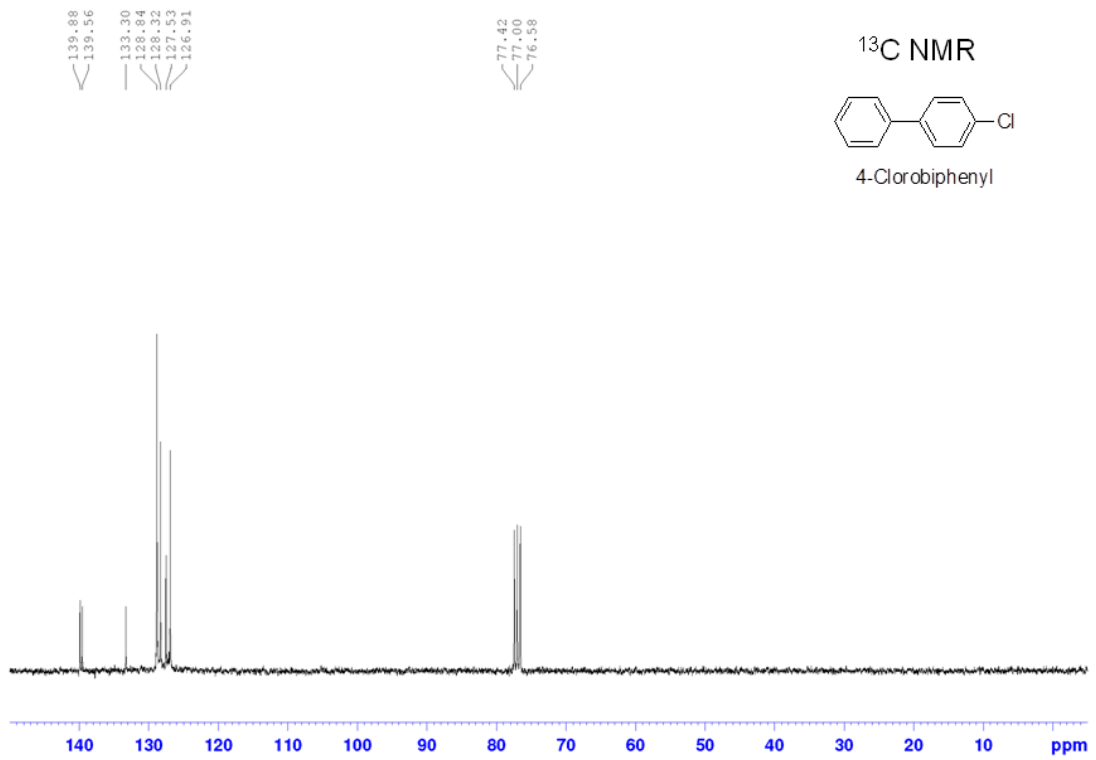

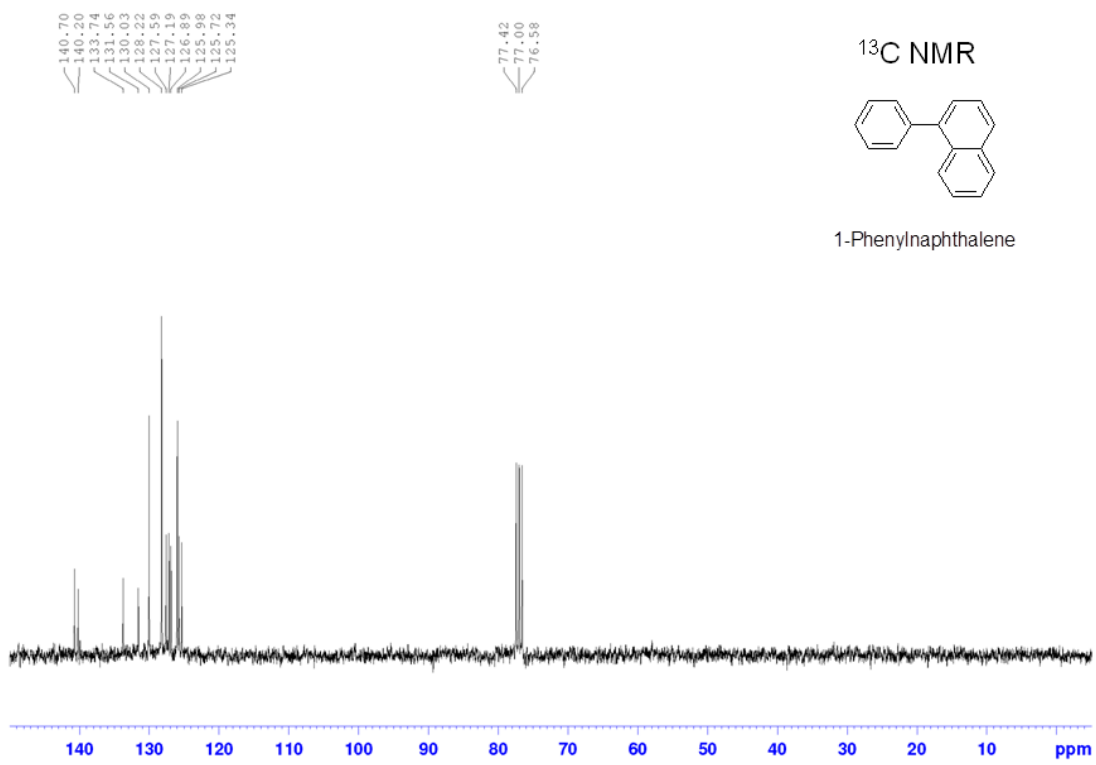

## References

- [1] S. N. Chen, W. Y. Wu, F. Y. Tsai, *Tetrahedron*, **2008**, *64*, 8164 – 8168.
- [2] W. Y. Wu, T. C. Lin, T. Takahashi, F. Y. Tsai, C. Y. Mou, *ChemCatChem.*, **2013**, 1011 – 1019
- [3] T. Yanase, Y. Monguchi, H. Sajiki, *RSC Adv.*, **2012**, *2*, 590 – 594.
- [4] L. Zhang, P. Li, H. Li, L. Wang, *Catal. Sci. Technol.*, **2012**, *2*, 1859 – 1864.
- [5] F. Ye, Y. Shi, L. Zhou, Q. Xiao, Y. Zhang, J. Wang, *Org. Lett.*, **2011**, *13*, 5020 – 5023.
- [6] D. Srimani, S. Sawoo, A. Sarkar, *Org. Lett.*, **2007**, *9*, 3639 – 3642.
